# Supplementary material for: Multicenter Evaluation of a PCR-Based Digital Microfluidics and Electrochemical Detection System for the Rapid Identification of 15 Fungal Pathogens Directly from Positive Blood Cultures
Source: PubMed Central journal article supplement (PMC7180249; doi:10.1128/jcm.02096-19), 2020-04-23
Supplement: JCM.02096-19-s0001.pdf [file JCM.02096-19-s0001.pdf]

**Supplementary Table 1.** Description of each gene target used in the PCR/sequencing identification assay\*

| Pathogen Target               | Molecular Target | Description                                              | Primer Sequence (5'–3')            | Size |
|-------------------------------|------------------|----------------------------------------------------------|------------------------------------|------|
| <i>Candida albicans</i>       | RPB1             | DNA-directed RNA polymerase II subunit rpb1              | F: M13–TCAGTGGCAAAAATAGAGTATCCTG   | 430  |
|                               |                  |                                                          | R: M13–CATCTCTACGAATAGTTGGTTGTGG   |      |
| <i>Candida auris</i>          | GABA             | gamma-aminobutyric acid (GABA) A receptor                | F: GGATACCGAGGAGATCATCCAG          | 377  |
|                               |                  |                                                          | R: CATTTCCTTGACGTGGTCAGG           |      |
| <i>Candida dubliniensis</i>   | HWP1             | Hyphal wall protein 1                                    | F: M13–CCACTCCAGAAGCTTCCACT        | 485  |
|                               |                  |                                                          | R: M13–CCAAAAAAGAACAGACACGGAT      |      |
| <i>Candida famata</i>         | GAPDH            | Glyceraldehyde-3-phosphate dehydrogenase                 | F: M13–ATGATGACATCATTAGACATTCGGATT | 384  |
|                               |                  |                                                          | R: M13–TTTCCGGCAACTTGACTTCTG       |      |
| <i>Candida glabrata</i>       | RPB1             | DNA-directed RNA polymerase II subunit rpb1              | F: M13–CAAGCAATTCAAATCAAGGATCCA    | 445  |
|                               |                  |                                                          | R: M13–CCTTCAAGATATCTGCCAATTTGAAT  |      |
| <i>Candida guilliermondii</i> | FKS1             | Beta-1,3-glucan synthase catalytic subunit 1             | F: M13–GAATCAAGCACTGTGAATACTACCAG  | 488  |
|                               |                  |                                                          | R: M13–CAACGAGATAAGATGGCGACAG      |      |
| <i>Candida kefyr</i>          | EIF-2 $\alpha$   | Eukaryotic Translation Initiation Factor 2 Subunit Alpha | F: M13–GCAGTTATGGATGCTGCTCTATTA    | 477  |
|                               |                  |                                                          | R: M13–TCTTACCTTGATCGTCCTTAGTAACT  |      |
| <i>Candida krusei</i>         | CS1              | Citrate synthase 1                                       | F: M13–TTGCTGAATTGTTACCTGGCTG      | 441  |
|                               |                  |                                                          | R: M13–CCTTCGCGAATTTGGATTCTGA      |      |
| <i>Candida lusitanae</i>      | FKS1             | Beta-1,3-glucan synthase catalytic subunit 1             | F: M13–CTGTGTTTTCTCCATTGGACGT      | 504  |
|                               |                  |                                                          | R: M13–GAAAATTGATCGTCTTCCCTGATGATC |      |
| <i>Candida parapsilosis</i>   | RPB1             | DNA-directed RNA polymerase II subunit rpb1              | F: M13–GGGTGATGATGTCATTAACAAG      | 418  |
|                               |                  |                                                          | R: M13–CAACTTCTTTGCTTGGTCACGAG     |      |
| <i>Candida orthopsilosis</i>  | RPB1             | DNA-directed RNA polymerase II subunit rpb1              | F: M13–TGGTGATGATGTGAMTAGTTAYAAAG  | 418  |
|                               |                  |                                                          | R: M13–CAAYTTCTTAGCTTGGTCACGAG     |      |
| <i>Candida metapsilosis</i>   | RPB1             | DNA-directed RNA polymerase II subunit rpb1              | F: M13–AGGTGAAGATRTRCTGGATACAAG    | 418  |
|                               |                  |                                                          | R: M13–CAACTTCTTRGCTTGGTCACGMG     |      |
| <i>Candida tropicalis</i>     | SADH             | Alcohol dehydrogenase                                    | F: M13–GGTTTATTGCCAAGATCAAGAAATGT  | 333  |
|                               |                  |                                                          | R: M13–TTTCCAGTGGAGTCAATAAACGAC    |      |
| <i>Cryptococcus</i>           | RNA Pol          | RNA polymerase                                           | F: M13–CCTCTGGYGAGAACTGGAGAC       | 387  |

|                    |       |                               |                               |     |
|--------------------|-------|-------------------------------|-------------------------------|-----|
|                    |       |                               | R: M13–GCCTTGGCAATCTTCTCAACTC |     |
| <i>Fusarium</i>    | CAP10 | Capsular associated protein   | F: M13–GATCTACCAGTGCGGTGGTAT  | 410 |
|                    |       |                               | R: M13–GAGGAGTCTCGAACTCCAGAG  |     |
| <i>Rhodotorula</i> | MF1   | Anthocyanin methyltransferase | F: M13–TCTGCYATCCCATGGATTGG   | 314 |
|                    |       |                               | R: M13–TTGTCAGTGTCCYAGGTAG    |     |

\*Sanger sequencing assays were developed to detect and differentiate fungi present in bloodstream infections. The PCR primers were designed to detect clinically relevant strains, and they incorporate M13 universal sequencing tags. All PCR reactions utilized a primer annealing temperature of 58 °C and consisted of 40 cycles. With the exception of *Fusarium*, all assays used the Qiagen HotStarTaq Master Mix. Amplification of *Fusarium* was complicated by the presence of homopolymer tracts that cause polymerase slippage, resulting in poor quality sequencing results; therefore, this assay utilized the New England Biosciences Phusion High-Fidelity Polymerase, a proof-reading polymerase fused to a nonspecific dsDNA binding domain that enhances read-through of the mononucleotide repeat regions. Following PCR, amplicons were visualized by gel electrophoresis to verify successful amplification and then purified using Exonuclease I (Exo I) and Shrimp Alkaline Phosphatase (SAP). Each amplicon was sequenced with M13 primers using the BigDye Terminator v3.1 Cycle Sequencing Kit to yield 2x bi-directional coverage of at least 200 bp. Sequence reads were assembled using Sequencher software to generate a bi-directional consensus sequences. The resulting consensus sequences were then identified using the NCBI Basic Local Alignment Search Tool (BLAST).

**Supplementary Table 2. Contrived sample list \***

| <b>Fungal Organism</b>      | <b>Strain</b> | <b>Number Tested</b> | <b>Dilution (1 to x) (min-max)</b> | <b>Spiked-in CFUs/mL (min-max) <sup>a</sup></b> | <b>Time to Flag Positive <sup>b</sup> (DD:HH:MM) (min-max)</b> |
|-----------------------------|---------------|----------------------|------------------------------------|-------------------------------------------------|----------------------------------------------------------------|
| <i>Candida albicans</i>     | ATCC10231     | 2                    | 10 - 100                           | 24.83 - 279.38                                  | 00:18:12 - 05:18:26 <sup>c</sup>                               |
| <i>Candida albicans</i>     | ATCC14053     | 2                    | 100                                | 24.83 - 27.05                                   | 01:05:08 - 02:02:21                                            |
| <i>Candida albicans</i>     | ATCC24433     | 2                    | 10 - 10000                         | 0.26 - 239.47                                   | 00:19:12 - 02:23:09                                            |
| <i>Candida albicans</i>     | ATCC90028     | 5                    | 1 - 100                            | 19.45 - 2350.33                                 | 00:16:07 - 04:10:44                                            |
| <i>Candida albicans</i>     | ATCCMYA-4441  | 3                    | 10 - 10000                         | 0.25 - 243.90                                   | 00:19:12 - 01:15:08                                            |
| <i>Candida auris</i>        | ATCC10913     | 1                    | 10                                 | 235.03                                          | 00:20:09                                                       |
| <i>Candida auris</i>        | ATCC12372     | 1                    | 10                                 | 230.60                                          | 00:18:19                                                       |
| <i>Candida auris</i>        | ATCC12766     | 1                    | 10                                 | 248.34                                          | 00:17:09                                                       |
| <i>Candida auris</i>        | CBS10913      | 3                    | 10                                 | 199.56 - 234.41                                 | 00:17:08 - 00:22:12                                            |
| <i>Candida auris</i>        | CBS12372      | 3                    | 10                                 | 234.41 - 284.29                                 | 00:16:08 - 00:21:03                                            |
| <i>Candida auris</i>        | CBS12373      | 2                    | 10                                 | 186.25 - 284.29                                 | 00:21:08 - 01:00:05                                            |
| <i>Candida auris</i>        | CBS12766      | 3                    | 10                                 | 199.50 - 244.39                                 | 00:14:08 - 00:17:43                                            |
| <i>Candida auris</i>        | CBS12767      | 3                    | 10                                 | 208.43 - 248.34                                 | 00:16:06 - 00:16:09                                            |
| <i>Candida auris</i>        | CBS12768      | 2                    | 10                                 | 186.25 - 212.86                                 | 00:16:08 - 00:17:09                                            |
| <i>Candida auris</i>        | CDC#0385      | 5                    | 10 - 100                           | 26.61 - 309.23                                  | 00:12:30 - 01:12:11                                            |
| <i>Candida auris</i>        | CDC#0386      | 5                    | 10 - 100                           | 18.18 - 314.86                                  | 00:12:30 - 01:11:11                                            |
| <i>Candida auris</i>        | CDC#0387      | 5                    | 10 - 100                           | 26.61 - 243.90                                  | 00:12:30 - 00:22:10                                            |
| <i>Candida auris</i>        | CDC#0388      | 5                    | 10 - 100                           | 24.83 - 279.30                                  | 00:12:30 - 01:00:10                                            |
| <i>Candida auris</i>        | CDC#0389      | 5                    | 10 - 100                           | 23.06 - 294.26                                  | 00:12:30 - 00:22:10                                            |
| <i>Candida auris</i>        | CDC#0390      | 5                    | 10 - 100                           | 22.62 - 301.55                                  | 00:13:00 - 01:02:10                                            |
| <i>Candida dubliniensis</i> | ATCCMYA-577   | 6                    | 10 - 100                           | 28.93 - 283.81                                  | 00:17:10 - 00:20:07                                            |
| <i>Candida dubliniensis</i> | ATCCMYA-578   | 12                   | 10                                 | 186.25 - 2434.78                                | 00:14:03 - 00:20:14                                            |
|                             | ATCCMYA-579   | 12                   | 10 - 100000                        | 0.02 - 257.21                                   | 00:17:30 - 04:09:43                                            |
|                             | ATCCMYA-582   | 13                   | 10 - 20000                         | 0.11 - 257.21                                   | 00:17:04 - 04:08:03                                            |
|                             | NCPF3949      | 5                    | 10 - 100                           | 23.06 - 243.90                                  | 00:18:03 - 01:14:06                                            |

*Candida famata* species complex

|                                 |              |                |             |                 |                                  |
|---------------------------------|--------------|----------------|-------------|-----------------|----------------------------------|
| <i>Debaryomyces fabryi</i>      | CBS789       | 21             | 10          | 195.12 - 310.42 | 01:22:15 - 14:18:40 <sup>d</sup> |
| <i>Candida famata</i>           | CBS1961      | 3              | 10          | 243.90 - 274.31 | 01:04:14 - 01:11:07              |
| <i>Debaryomyces subglobosus</i> | CBS1796      | 27             | 10 - 100000 | 0.01 - 301.55   | 01:01:03 - 04:18:32              |
| <i>Candida glabrata</i>         | 128-4058     | 1              | 100         | 21.73           | 01:16:04                         |
| <i>Candida glabrata</i>         | 128-4072     | 1              | 100         | 31.42           | 03:17:40                         |
| <i>Candida glabrata</i>         | ATCC15126    | 2              | 100         | 20.84 - 21.29   | 00:22:08 - 00:23:02              |
| <i>Candida glabrata</i>         | ATCC15545    | 2              | 100 - 10000 | 0.23 - 19.96    | 01:01:11 - 01:18:09              |
| <i>Candida glabrata</i>         | ATCC2001     | 1              | 100         | 22.17           | 01:09:04                         |
| <i>Candida glabrata</i>         | ATCC66032    | 4              | 1 - 100000  | 0.02 - 2838.14  | 00:11:05 - 03:13:32              |
| <i>Candida glabrata</i>         | ATCC90030    | 2              | 1 - 100     | 19.07 - 2616.41 | 00:11:06 - 00:23:11              |
| <i>Candida glabrata</i>         | ATCCMYA-2950 | 3              | 1 - 100     | 15.52 - 3148.56 | 01:02:11 - 02:18:00              |
| <i>Candida guilliermondii</i>   | ATCC22017    | 13             | 10 - 10000  | 0.23 - 301.55   | 00:16:58 - 03:21:50              |
| <i>Candida guilliermondii</i>   | ATCC6260     | 12             | 10 - 10000  | 0.25 - 279.38   | 00:17:58 - 01:05:07              |
| <i>Candida guilliermondii</i>   | ATCC90197    | 10             | 10 - 100    | 23.95 - 288.25  | 00:16:58 - 00:23:10              |
| <i>Candida guilliermondii</i>   | ATCC90198    | 9              | 10 - 100    | 22.62 - 305.99  | 00:19:58 - 01:07:20              |
| <i>Candida guilliermondii</i>   | ATCC90199    | 6              | 10 - 100    | 23.95 - 270.51  | 00:18:07 - 01:00:05              |
| <i>Candida kefyr</i>            | ATCC204093   | 4              | 100 - 10000 | 0.29 - 30.16    | 00:15:03 - 01:12:06              |
| <i>Candida kefyr</i>            | ATCC2512     | 10             | 10 - 100    | 17.74 - 283.81  | 00:15:04 - 01:10:09              |
| <i>Candida kefyr</i>            | ATCC4135     | 13             | 10 - 100    | 18.18 - 266.08  | 00:14:04 - 00:23:09              |
| <i>Candida kefyr</i>            | ATCC66028    | 12             | 10 - 100    | 19.96 - 274.94  | 00:13:04 - 00:22:18              |
| <i>Candida kefyr</i>            | ATCC8553     | 12             | 1 - 100     | 19.51 - 2971.18 | 00:14:06 - 05:22:11 <sup>e</sup> |
| <i>Candida krusei</i>           | ATCC14243    | 8              | 10 - 100    | 17.29 - 261.64  | 00:16:04 - 01:03:08              |
| <i>Candida krusei</i>           | ATCC22985    | 9              | 10 - 10000  | 0.22 - 270.51   | 00:14:04 - 03:01:16              |
| <i>Candida krusei</i>           | ATCC28870    | 9              | 10 - 10000  | 0.43 - 279.38   | 00:13:04 - 02:00:49              |
| <i>Candida krusei</i>           | ATCC32196    | 10             | 10 - 10000  | 0.35 - 270.51   | 00:14:03 - 02:14:30              |
| <i>Candida krusei</i>           | ATCC34135    | 10             | 10 - 10000  | 0.35 - 301.55   | 00:13:09 - 03:02:30              |
| <i>Candida lusitanae</i>        | ATCC26287    | 6 <sup>f</sup> | 10 - 100    | 25.28 - 310.42  | 00:14:10 - 01:01:08              |
| <i>Candida lusitanae</i>        | ATCC34449    | 10             | 10 - 100    | 24.83 - 310.42  | 00:14:00 - 01:03:19              |
| <i>Candida lusitanae</i>        | ATCC42720    | 9              | 10 - 100    | 18.63 - 288.25  | 00:14:00 - 01:00:03              |
| <i>Candida lusitanae</i>        | ATCC66035    | 11             | 10 - 100    | 23.06 - 328.16  | 00:14:07 - 01:23:08              |

|                                                       |                 |    |                |                 |                                  |
|-------------------------------------------------------|-----------------|----|----------------|-----------------|----------------------------------|
| <i>Candida lusitanae</i>                              | ATCCMYA-766     | 10 | 10 - 100       | 21.29 - 288.25  | 00:16:00 - 01:19:08              |
| <i>Candida parapsilosis</i>                           | ATCC22019       | 11 | 10 - 100       | 19.96 - 266.08  | 00:19:09 - 03:01:16              |
| <i>Candida parapsilosis</i>                           | ATCC28474       | 5  | 10 - 100       | 18.18 - 208.82  | 02:13:30 - 03:07:17              |
| <i>Candida parapsilosis</i>                           | ATCC28475       | 10 | 10 - 100       | 19.07 - 230.60  | 00:18:19 - 02:18:17              |
| <i>Candida parapsilosis</i>                           | ATCC58895       | 7  | 10 - 100       | 26.16 - 243.90  | 00:17:08 - 02:06:11              |
| <i>Candida parapsilosis</i>                           | ATCC90018       | 8  | 10 - 100       | 18.63 - 270.51  | 00:19:09 - 01:06:15              |
| <i>Candida tropicalis</i>                             | ATCC1369        | 9  | 10 - 10000     | 0.25 - 270.51   | 00:12:39 - 02:02:10              |
| <i>Candida tropicalis</i>                             | ATCC13803       | 12 | 10 - 10000     | 0.24 - 248.34   | 00:13:07 - 01:11:05              |
| <i>Candida tropicalis</i>                             | ATCC201380      | 9  | 10 - 10000     | 0.24 - 270.51   | 00:14:06 - 02:01:10              |
| <i>Candida tropicalis</i>                             | ATCC201381      | 7  | 10 - 10000     | 0.35 - 203.99   | 00:15:08 - 01:22:05              |
| <i>Candida tropicalis</i>                             | ATCC750         | 8  | 10 - 10000     | 0.25 - 257.21   | 00:15:07 - 02:00:07              |
| <i>Cryptococcus gattii</i>                            | ATCC14248       | 11 | 10 - 100       | 17.74 - 239.47  | 01:06:00 - 01:23:09              |
|                                                       | ATCC76108       | 12 | 10 - 100       | 17.74 - 266.08  | 01:04:07 - 02:19:11              |
|                                                       | ATCCMYA-4138    | 10 | 10 - 100       | 17.74 - 297.12  | 01:00:07 - 07:23:21 <sup>g</sup> |
|                                                       | ATCCMYA-4560    | 8  | 10 - 100       | 18.63 - 270.51  | 01:05:00 - 09:02:24 <sup>g</sup> |
| <i>Cryptococcus gattii</i>                            | ATCCMYA-4877    | 9  | 10 - 100       | 17.29 - 288.25  | 01:05:07 - 06:00:18 <sup>g</sup> |
| <i>Cryptococcus neoformans</i> var. <i>grubii</i>     | ATCC14116       | 9  | 1 - 100        | 17.29 - 2217.29 | 01:09:06 - 01:22:12              |
| <i>Cryptococcus neoformans</i> var. <i>grubii</i>     | ATCC208821(H99) | 8  | 10 - 100       | 18.63 - 292.68  | 01:07:00 - 03:00:17              |
| <i>Cryptococcus neoformans</i> var. <i>grubii</i>     | ATCC90112       | 7  | 10 - 100       | 19.51 - 257.21  | 01:07:00 - 02:02:12              |
| <i>Cryptococcus neoformans</i> var. <i>grubii</i>     | NCPF8195        | 7  | 10 - 100       | 19.51 - 235.03  | 01:13:03 - 02:01:11              |
| <i>Cryptococcus neoformans</i> var. <i>grubii</i>     | NCPF8299        | 3  | 10 - 100       | 25.72 - 279.38  | 01:06:07 - 01:17:12              |
| <i>Cryptococcus neoformans</i> var. <i>grubii</i>     | NCPF8357        | 3  | 10 - 100       | 23.95 - 270.51  | 01:06:08 - 01:19:12              |
| <i>Cryptococcus neoformans</i> var. <i>neoformans</i> | ATCC34873       | 3  | 10             | 190.69 - 261.64 | 01:14:17 - 01:20:12              |
| <i>Cryptococcus neoformans</i> var. <i>neoformans</i> | ATCC36556       | 3  | 10             | 230.60 - 301.55 | 02:08:09 - 02:12:17              |
| <i>Cryptococcus neoformans</i> var. <i>neoformans</i> | ATCCMYA-565     | 9  | 10 - 100       | 17.29 - 283.81  | 01:06:00 - 02:12:14              |
| <i>Fusarium dimerum</i>                               | CBS108944       | 3  | 100000         | 2.26            | 01:13:09 - 01:19:05              |
| <i>Fusarium dimerum</i>                               | CBS110317       | 9  | 10000 - 100000 | 2.35 - 3.44     | 01:21:09 - 08:12:17 <sup>h</sup> |
| <i>Fusarium dimerum</i>                               | CBS116520       | 3  | 100000         | 3.86            | 01:11:07 - 01:17:05              |
| <i>Fusarium oxysporum</i>                             | CBS116611       | 1  | 1000           | 82.93           | 11:18:11                         |

|                                          |           |    |            |                  |                                  |
|------------------------------------------|-----------|----|------------|------------------|----------------------------------|
| <i>Fusarium sacchari</i>                 | ATCC24379 | 10 | 10 - 10000 | 1.86 - 1862.53   | 02:04:17 - 04:18:15              |
|                                          | CBS119828 | 11 | 10 - 10000 | 13.46 - 13458.98 | 01:07:59 - 03:15:00              |
| <i>Fusarium solani</i>                   | ATCC36031 | 11 | 10 - 10000 | 3.44 - 3436.81   | 01:22:11 - 03:03:30              |
| <i>Fusarium verticillioides</i>          | CBS100312 | 11 | 10 - 10000 | 6.27 - 6274.94   | 01:19:08 - 02:11:00              |
|                                          | ATCC38159 | 11 | 10 - 10000 | 4.57 - 4567.63   | 02:14:12 - 03:14:00              |
| <i>Rhodotorula glutinis</i> <sup>i</sup> | ATCC32765 | 3  | NA         | N/A              | NA                               |
| <i>Rhodotorula glutinis</i>              | ATCC32766 | 3  | NA         | N/A              | NA                               |
| <i>Rhodotorula glutinis</i>              | ATCC96365 | 4  | NA         | N/A              | NA                               |
| <i>Rhodotorula mucilaginosa</i>          | ATCC66034 | 21 | 1 - 1000   | 2.04 - 2439.02   | 01:08:09 - 02:18:06              |
| <i>Rhodotorula mucilaginosa</i>          | ATCC9449  | 19 | 10         | 190.69 - 274.94  | 01:01:05 - 11:11:30 <sup>j</sup> |

---

\* A total of 678 contrived samples are listed; 47 negative contrived samples that are not included in this supplementary table as they did not contain organisms targeted by the BCID-FP Panel.

<sup>a</sup> Volume spiked was 100uL except 1 replicate of *C. dubliniensis* ATCCMYA-578 (1 mL) and 1 replicate of *F. verticillioides* ATCC38159 (400 uL).

<sup>b</sup> The majority of contrived samples were inoculated into the BacTec Myco/F lytic bottles (640). There were 39 samples inoculated in BacTec Plus Aerobic/F bottles, and 46 in BacTec Peds Pus/F bottles.

<sup>c</sup> One replicate of the strain with 1:100 dilution took greater than 5 days to ring positive

<sup>d</sup> Eleven replicates of the strain took greater than 5 days to ring positive.

<sup>e</sup> One replicate of the strain took greater than 5 days to ring positive.

<sup>f</sup> One of these replicates was a final, invalid result after ePlex BCID-FP testing, so this result was not included in the performance table (Table 2). There were 46 *C. lusitaniae* contrived samples tested but only 45 had valid results to be included.

<sup>g</sup> One replicate of the strain took greater than 5 days to ring positive

<sup>h</sup> Six replicates of the strain took greater than 5 days to ring positive.

<sup>i</sup> Contrived using quantified glycerol stocks (not grown in blood culture system).

<sup>j</sup> Twelve replicates of the strain took greater than 5 days to ring positive.

**Supplementary Table 3. Expected Value (Positivity Rate [%]) for the BCID-FP Panel by Age Group (Prospective Samples)**

| <b>Target</b>                  | <b>All Ages<br/>(N=21)*</b> | <b>Age &lt;1<br/>(N=1)</b> | <b>Age 1-17<br/>(N=2)</b> | <b>Age 18-44<br/>(N=4*)</b> | <b>Age 45-64<br/>(N=11*)</b> | <b>Age 65-84<br/>(N=2)</b> | <b>Age 85+<br/>(N=1*)</b> |
|--------------------------------|-----------------------------|----------------------------|---------------------------|-----------------------------|------------------------------|----------------------------|---------------------------|
| <i>Candida albicans</i>        | 4 (19.0)                    | 1 (100)                    | 0                         | 0                           | 2 (18.2)                     | 1 (50.0)                   | 0                         |
| <i>Candida auris</i>           | 0                           | 0                          | 0                         | 0                           | 0                            | 0                          | 0                         |
| <i>Candida dubliniensis</i>    | 1 (4.8)                     | 0                          | 0                         | 0                           | 1 (9.1)                      | 0                          | 0                         |
| <i>Candida famata</i>          | 0                           | 0                          | 0                         | 0                           | 0                            | 0                          | 0                         |
| <i>Candida glabrata</i>        | 6 (28.6)                    | 0                          | 1 (50.0)                  | 1 (25.0)                    | 3 (27.3)                     | 1 (50.0)                   | 0                         |
| <i>Candida guilliermondii</i>  | 0                           | 0                          | 0                         | 0                           | 0                            | 0                          | 0                         |
| <i>Candida kefyr</i>           | 0                           | 0                          | 0                         | 0                           | 0                            | 0                          | 0                         |
| <i>Candida krusei</i>          | 2 (9.5)                     | 0                          | 0                         | 0                           | 2 (18.2)                     | 0                          | 0                         |
| <i>Candida lusitanae</i>       | 0                           | 0                          | 0                         | 0                           | 0                            | 0                          | 0                         |
| <i>Candida parapsilosis</i>    | 2 (9.5)                     | 0                          | 1 (50.0)                  | 0                           | 1 (9.1)                      | 0                          | 0                         |
| <i>Candida tropicalis</i>      | 2 (9.5)                     | 0                          | 0                         | 1 (25.0)                    | 1 (9.1)                      | 0                          | 0                         |
| <i>Cryptococcus gattii</i>     | 0                           | 0                          | 0                         | 0                           | 0                            | 0                          | 0                         |
| <i>Cryptococcus neoformans</i> | 0                           | 0                          | 0                         | 0                           | 0                            | 0                          | 0                         |
| <i>Fusarium</i>                | 0                           | 0                          | 0                         | 0                           | 0                            | 0                          | 0                         |
| <i>Rhodotorula</i>             | 1 (4.8)                     | 0                          | 0                         | 1 (25.0)                    | 0                            | 0                          | 0                         |

\* 3 samples only had off-panel organisms identified by standard-of-care methods (1 sample: *C. metapsilosis* and *Trichosporon asahii*; 1 sample: *Saccharomyces cerevisiae*; 1 sample: *Cryptococcus laurentii*); therefore, the ePlex BCID-FP Panel results were 'Not Detected' for all targets.

**Supplementary Table 4. Demographics of subjects with positive blood culture for fungal organisms**

|             | <b>Prospectively-Collected<br/>(N=21)</b> | <b>Retrospectively-Collected<br/>(N=120)</b> | <b>All Clinical Samples<br/>(N=141)</b> |
|-------------|-------------------------------------------|----------------------------------------------|-----------------------------------------|
| Sex         |                                           |                                              |                                         |
| Male        | 14 (66.7)                                 | 68 (56.7)                                    | 82 (58.2)                               |
| Female      | 7 (33.3)                                  | 52 (43.3)                                    | 59 (41.8)                               |
| Age (years) |                                           |                                              |                                         |
| Mean        | 48.1                                      | 53.5                                         | 52.7                                    |
| Median      | 55.0                                      | 58.0                                         | 57.0                                    |
| SD          | 22.4                                      | 22.5                                         | 22.5                                    |
| Minimum     | 0.8                                       | 0.0                                          | 0.0                                     |
| Maximum     | 90.0                                      | 89.0                                         | 90.0                                    |
| <1 yr       | 1 (4.8)                                   | 2 (1.7)                                      | 3 (2.1)                                 |
| 1-17 yrs    | 2 (9.5)                                   | 8 (6.7)                                      | 10 (7.1)                                |
| 18-44 yrs   | 4 (19.0)                                  | 27 (22.5)                                    | 31 (22.0)                               |
| 45-64 yrs   | 11 (52.4)                                 | 39 (32.5)                                    | 50 (35.5)                               |
| 65-84 yrs   | 2 (9.5)                                   | 39 (32.5)                                    | 41 (29.1)                               |
| 85+ yrs     | 1 (4.8)                                   | 5 (4.2)                                      | 6 (4.3)                                 |

**Supplementary Table 5. Blood Culture Bottle Type**

|                                      | <b>Contrived<br/>(N=725 <sup>a</sup>)<br/>n (%)</b> | <b>Prospective<br/>Fresh<br/>(N=11)<br/>n (%)</b> | <b>Prospective<br/>Frozen<br/>(N=10)<br/>n (%)</b> | <b>Retrospective<br/>(N=120)<br/>n (%)</b> |
|--------------------------------------|-----------------------------------------------------|---------------------------------------------------|----------------------------------------------------|--------------------------------------------|
| BacT/Alert - SA (Standard Aerobic)   | 0                                                   | 0                                                 | 2 (20.0)                                           | 5 (4.2)                                    |
| BacT/Alert - SN (Standard Anaerobic) | 0                                                   | 0                                                 | 0                                                  | 4 (3.3)                                    |
| BacTec - Lytic/10 Anaerobic/F        | 0                                                   | 0                                                 | 1 (10.0)                                           | 19 (15.8)                                  |
| BacTec - PLUS Aerobic/F              | 39 (5.4)                                            | 9 (81.8)                                          | 5 (50.0)                                           | 39 (32.5)                                  |
| BacTec - PLUS Anaerobic/F            | 0                                                   | 0                                                 | 1 (10.0)                                           | 0                                          |
| BacTec - Peds Plus /F                | 46 (6.3)                                            | 1 (9.1)                                           | 0                                                  | 8 (6.7)                                    |
| BacTec - Standard/10 Aerobic/F       | 0                                                   | 0                                                 | 0                                                  | 27 (22.5)                                  |
| BacTec - Standard Anaerobic/F        | 0                                                   | 0                                                 | 1 (10.0)                                           | 1 (0.8)                                    |
| BacTec - Myco/F Lytic                | 640 (88.3)                                          | 0                                                 | 0                                                  | 0                                          |
| VersaTREK - Redox 1 EZ Draw          | 0                                                   | 1 (9.1)                                           | 0                                                  | 17 (14.2)                                  |

<sup>a</sup> Only including the evaluable samples. One contrived sample was excluded due to a final, invalid result.
