# Supplementary material for: Multicenter Evaluation of a PCR-Based Digital Microfluidics and Electrochemical Detection System for the Rapid Identification of 15 Fungal Pathogens Directly from Positive Blood Cultures
Source: PubMed Central journal article supplement (PMC7180249; doi:10.1128/jcm.02096-19), 2020-04-23
Supplement: JCM.02096-19-s0002.pdf [file JCM.02096-19-s0002.pdf]

# Supplementary Figure 1. ePlex BCID-FP Panel Report (IVD Report Shown)

GenMark Diagnostics | 5964 La Place Ct, Carlsbad, CA 92008

## BCID-FP Detection Report

|                           |                 |                            |                     |
|---------------------------|-----------------|----------------------------|---------------------|
| Accession ID:             | 555666777888    | Date/Time Completed:       | 08/08/2019 11:29 AM |
| Patient ID:               |                 | Bay Location:              | A1                  |
| Protocol:                 | BCID-FP 6.0.1.5 | Cartridge ID:              | 12345614062         |
| Software Version:         | 2.5.1.0         | Cartridge Lot Number:      | 5162048             |
| Operator:                 | Internal        | Cartridge Expiration Date: | 12/31/2020          |
| Instrument Serial Number: | 000000          |                            |                     |

### SUMMARY

No targets detected.

### RESULTS

| Target                         | Result       |
|--------------------------------|--------------|
| <i>Candida albicans</i>        | Not Detected |
| <i>Candida auris</i>           | Not Detected |
| <i>Candida dubliniensis</i>    | Not Detected |
| <i>Candida famata</i>          | Not Detected |
| <i>Candida glabrata</i>        | Not Detected |
| <i>Candida guilliermondii</i>  | Not Detected |
| <i>Candida kefyr</i>           | Not Detected |
| <i>Candida krusei</i>          | Not Detected |
| <i>Candida lusitanae</i>       | Not Detected |
| <i>Candida parapsilosis</i>    | Not Detected |
| <i>Candida tropicalis</i>      | Not Detected |
| <i>Cryptococcus gattii</i>     | Not Detected |
| <i>Cryptococcus neoformans</i> | Not Detected |
| <i>Fusarium</i>                | Not Detected |
| <i>Rhodotorula</i>             | Not Detected |
| Internal Control               | <b>PASS</b>  |

### COMMENTS

### FLAGS

Operator Signature

Date

Approver Signature

Date
